# Supplementary material
Source: Springer Nature journal article supplement (https://www.springermedizin.de/resource/supplementary/12916_2007_129_MOESM3_ESM.pdf/9599232)

A

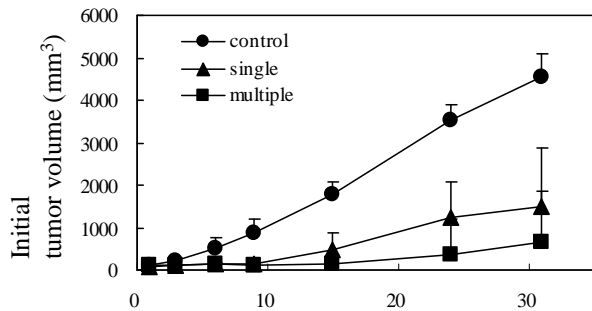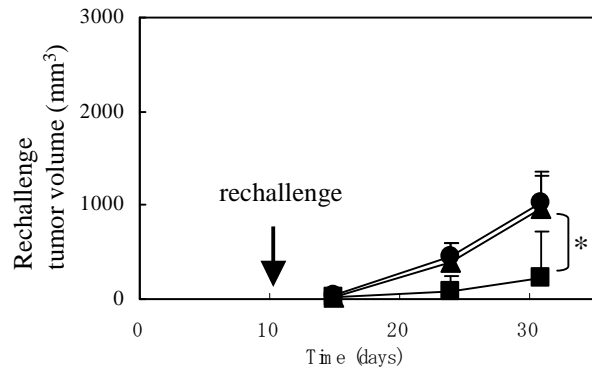

B

|          | Initial tumor | Rechallenge tumor |
|----------|---------------|-------------------|
| control  | 0%            | 0%                |
| single   | 25%           | 0%                |
| multiple | 60%           | 80%               |

Supplement: MOESM3 [file 9599232]
